# Supplementary material for: Does enhanced physical rehabilitation following intensive care unit discharge improve outcomes in patients who received mechanical ventilation? A systematic review and meta-analysis
Source: PubMed Central journal article supplement — BMJ Open. 2019 Jun 9;9(6):e026075. doi: 10.1136/bmjopen-2018-026075 (PMC6561459; doi:10.1136/bmjopen-2018-026075), 2019-06-09
Supplement: bmjopen-2018-026075supp005.pdf [file bmjopen-2018-026075supp005.pdf]

Online supplementary file 5. Assessment of risk of bias in the analysed trials using the Cochrane risk-of-bias assessment tool

| Trial                         | Random sequence generation | Allocation concealment | Blinding of participants and personnel | Blinding of outcome assessment | Incomplete outcome data | Selective reporting  | Other bias           |
|-------------------------------|----------------------------|------------------------|----------------------------------------|--------------------------------|-------------------------|----------------------|----------------------|
| Jones et al., 2003 (22)       | Low <sup>a</sup>           | Low <sup>a</sup>       | High                                   | Low                            | High                    | Unclear <sup>a</sup> | Unclear <sup>b</sup> |
| Cuthbertson et al., 2009 (23) | Low                        | Low                    | High                                   | Low                            | High                    | Low                  | Unclear <sup>b</sup> |
| Elliott et al., 2011 (24)     | Low                        | Low                    | High                                   | Low                            | High                    | High                 | Unclear <sup>c</sup> |
| Salisbury et al., 2010 (25)   | Low                        | Low                    | High                                   | Low                            | Low                     | Unclear              | High <sup>d</sup>    |
| Batterham et al., 2014 (26)   | Low                        | Low                    | High                                   | Low                            | Low                     | High                 | Unclear <sup>e</sup> |
| Connolly et al., 2015 (11)    | Low                        | Low                    | High                                   | High                           | Low                     | High                 | Unclear <sup>e</sup> |
| Walsh et al., 2015 (12)       | Low                        | Low                    | High                                   | Low                            | High                    | High                 | High <sup>d</sup>    |
| McWilliams et al., 2016 (13)  | Low                        | Low                    | High                                   | Low                            | Low                     | Low                  | Unclear <sup>e</sup> |
| Shelly et al., 2017 (27)      | Low                        | Low                    | High                                   | Unclear                        | Low                     | Low                  | Unclear <sup>e</sup> |
| McDowell et al., 2017 (15)    | Low                        | Low                    | High                                   | Low                            | High                    | Low                  | High <sup>f</sup>    |

<sup>a</sup>Unpublished data (reply from the authors: the randomization was undertaken the old-fashioned way, with 6 slips of paper, 3 marked interventions and 3 controls, put in 6 sequentially numbered opaque envelopes and sealed and shuffled to mix them, but protocol was not published)

<sup>b</sup>Dose of physical rehabilitation was unknown

<sup>c</sup>Adherence to the intervention was unknown

<sup>d</sup>Intervention included nutritional therapy

<sup>e</sup>Very little detail given regarding the therapy received in the control group

<sup>f</sup>Adherence to the intervention was 70%
